# Supplementary material
Source: PubMed Central journal article supplement (PMC6422029)
Supplement: NIHMS1010170-supplement-Fig_S1-S7_and_Tables_S3-S4.pdf [file NIHMS1010170-supplement-Fig_S1-S7_and_Tables_S3-S4.pdf]

**Supplemental Information**

**Overcoming Resistance to Dual Innate Immune  
and MEK Inhibition Downstream of *KRAS***

**Shunsuke Kitajima, Hajime Asahina, Ting Chen, Sujuan Guo, Laura Gutierrez Quiceno, Jillian D. Cavanaugh, Ashley A. Merlino, Shoichiro Tange, Hideki Terai, Jong Wook Kim, Xiaoen Wang, Shan Zhou, Man Xu, Stephen Wang, Zehua Zhu, Tran C. Thai, Chiaki Takahashi, Yujin Wang, Richard Neve, Susanna Stinson, Pablo Tamayo, Hideo Watanabe, Paul T. Kirschmeier, Kwok-Kin Wong, and David A. Barbie**

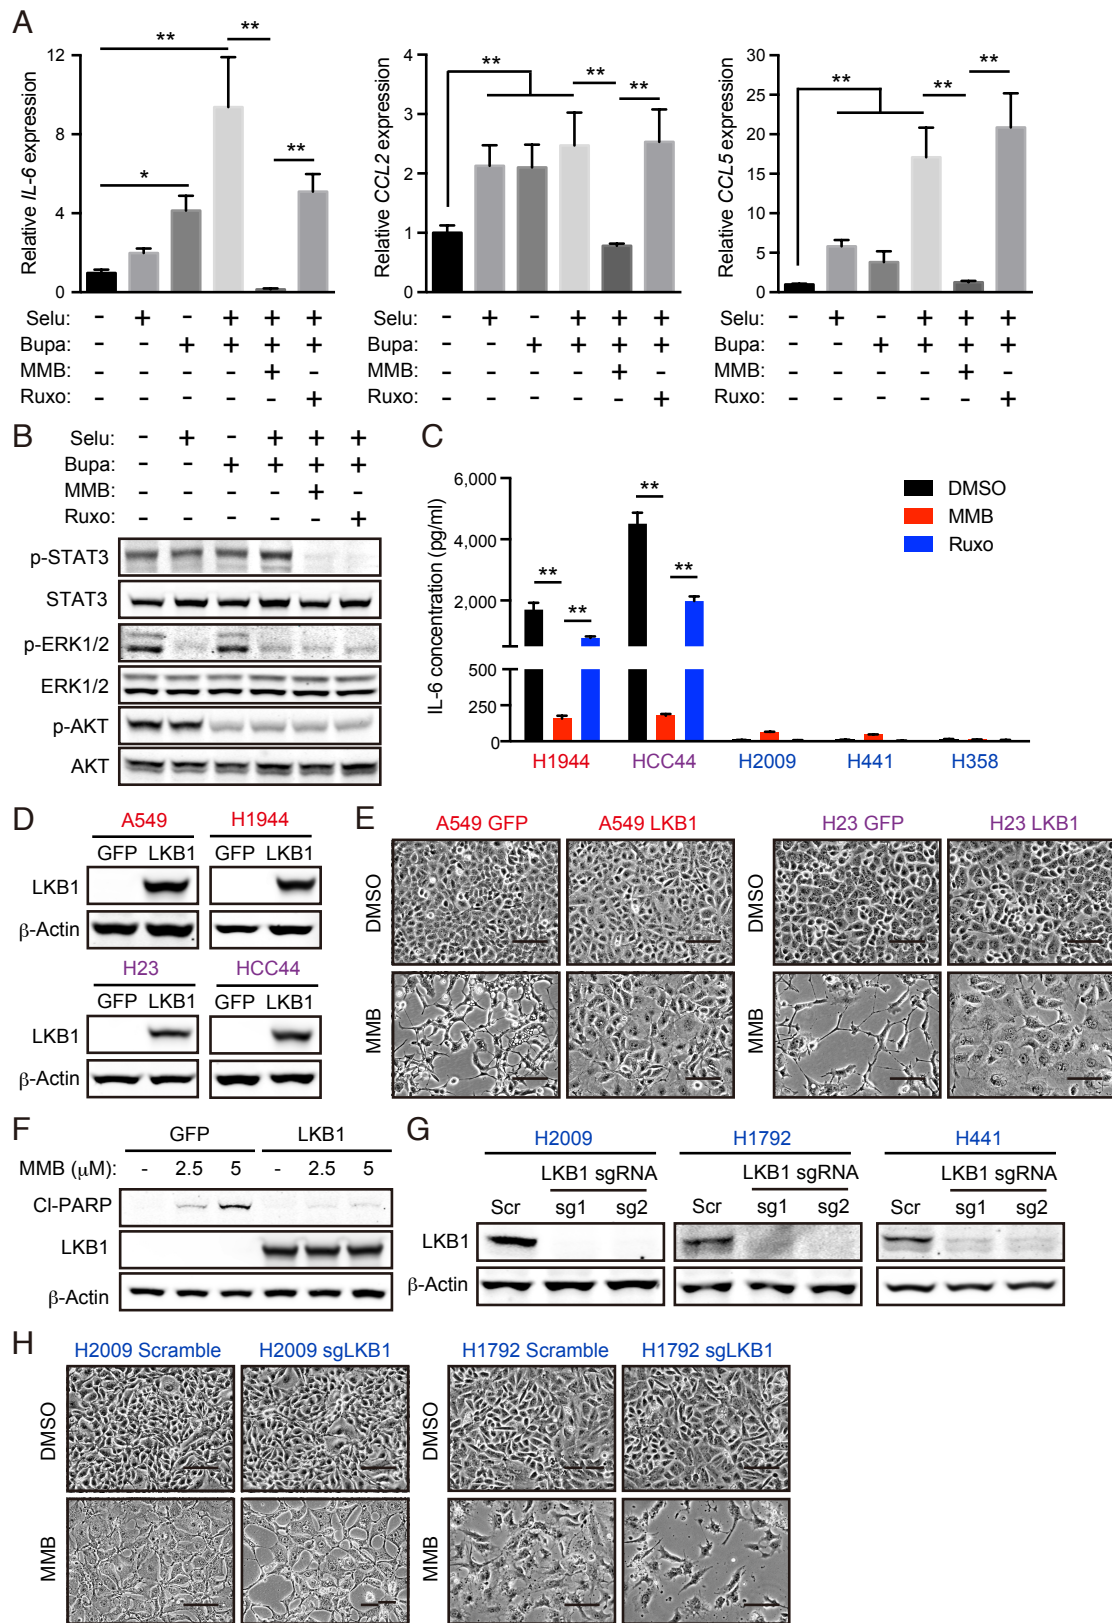

**Figure S1. Feedback cytokine induction and MMB sensitivity of KL cells (Related to Figure 1)**

(A) qRT-PCR of *IL-6*, *CCL2* and *CCL5* in A549 cells treated with 1  $\mu$ M selumetinib (Selu), 1  $\mu$ M buparlisib (Bupa), 2.5  $\mu$ M momelotinib (MMB) and/or 1  $\mu$ M ruxolitinib (Ruxo) for 48 hr (n = 4).

(B) Immunoblot (IB) of the indicated proteins in A549 cells treated with 1  $\mu$ M Selu, 1  $\mu$ M Bupa, 2.5  $\mu$ M MMB and/or 1  $\mu$ M Ruxo for 48 hr.

(C) ELISA of human IL-6 levels in conditioned medium derived from H1944, HCC44, H2009, H441 and H358 cells treated with 2.5  $\mu$ M MMB or 1  $\mu$ M Ruxo for 24 hr (n = 2). Red cell lines: KL. Purple cell lines: KLP. Blue cell lines: KP.

(D) IB of the indicated proteins in A549, H1944, H23 and HCC44 cells transduced with the indicated vector. Cells were cultured in serum-free and glucose-free medium for 1 h. Red cell lines: KL. Purple cell lines: KLP.

(E) Phase-contrast images of A549 and H23 cells transduced with the indicated vector and treated with 2.5  $\mu$ M MMB. Scale bars: 100  $\mu$ m. Red cell lines: KL. Purple cell lines: KLP.

(F) IB of the indicated proteins in A549 cells transduced with the indicated vector and treated with indicated concentration of MMB for 24 hr.

(G) IB of the indicated proteins in H2009, H1792 and H441 cells transduced with the indicated sgRNA. Blue cell lines: KP.

(H) Phase-contrast images of H2009 and H1792 cells transduced with the indicated vector and treated with 2.5  $\mu$ M MMB. Scale bars: 100  $\mu$ m. Blue cell lines: KP.

All quantitative data are represented as mean  $\pm$  S.D; \*p < 0.05, \*\*p < 0.01.

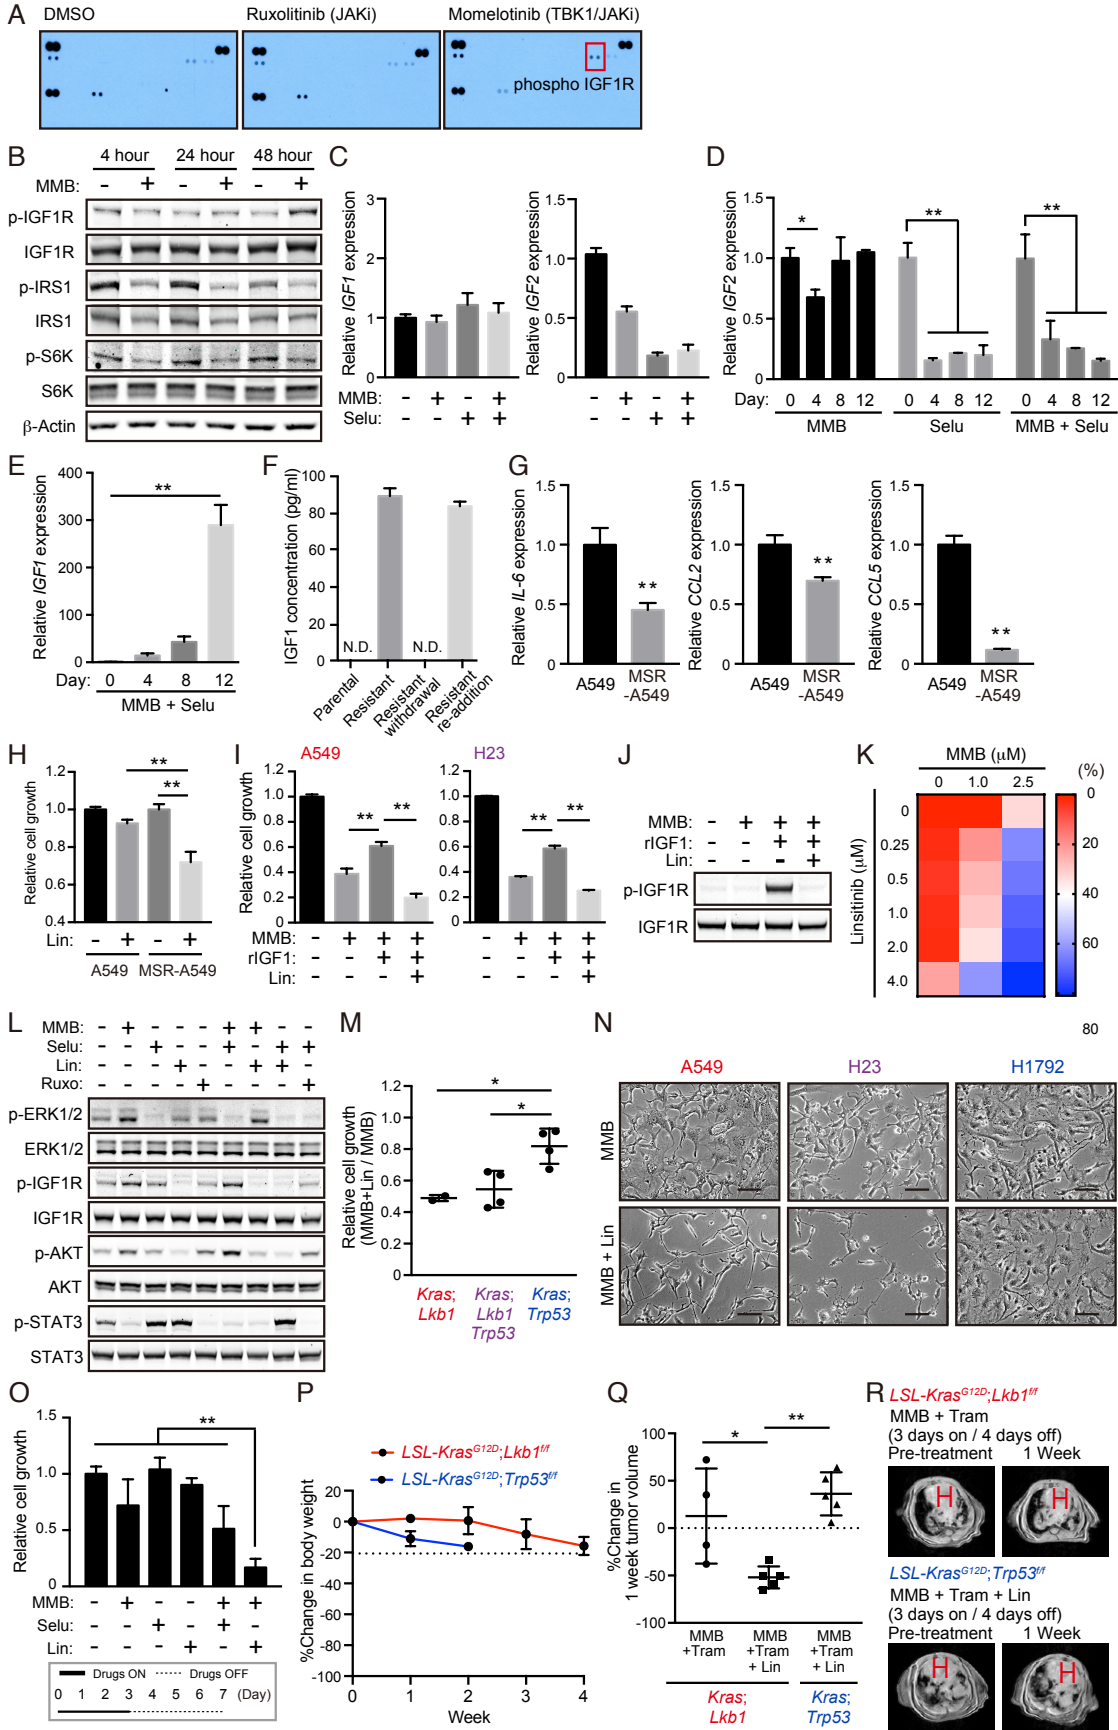

**Figure S2. IGF1R pathway activation in response to MMB and MEK inhibition (Related to Figure 2)**

(A) Receptor tyrosine kinase arrays of A549 cells treated with 5  $\mu$ M ruxolitinib (Ruxo) or 5  $\mu$ M MMB for 24 hr. Red box indicates phospho-IGF1R signals.

(B) IB of the indicated proteins in A549 cells treated with 5  $\mu$ M MMB for the indicated time.

(C) qRT-PCR of *IGF1* and *IGF2* in A549 cells treated with 5  $\mu$ M MMB and/or 1  $\mu$ M Selu for 48 hr (n = 4).

(D) qRT-PCR of *IGF2* in A549 treated with 5  $\mu$ M MMB and/or 1  $\mu$ M Selu for the indicated time (n = 2).

(E) qRT-PCR of *IGF1* in A549 treated with 5  $\mu$ M MMB and 1  $\mu$ M Selu for the indicated time (n = 2).

(F) ELISA of human IGF1 levels in conditioned medium derived from A549, MSR-A549, MSR-A549 withdrawal, and MSR-A549 re-addition cells. N.D.: Not detected (n = 2).

(G) qRT-PCR of *IL-6*, *CCL2* and *CCL5* in A549 and MSR-A549 cells (n = 4).

(H) Relative cell growth of A549 and MSR-A549 cells in the presence of 1  $\mu$ M linsitinib (Lin) for 72 hr (n = 3).

(I) Relative cell growth of A549 and H23 cells in the presence of 2.5  $\mu$ M MMB with or without 1  $\mu$ M Lin and/or 100 ng/ml recombinant IGF1 for 72 hr (n = 3).

(J) IB of the indicated proteins in A549 treated with 2.5  $\mu$ M MMB with or without 1  $\mu$ M Lin and/or 100 ng/ml recombinant IGF1 for 24 hr.

(K) Percent inhibition in A549 cells at each concentration of MMB and Lin for 96 hr.

(L) IB of the indicated proteins in A549 cells treated with 2.5  $\mu$ M MMB, 1  $\mu$ M Selu, 1  $\mu$ M Lin, and/or 1  $\mu$ M Ruxo for 24 hr.

(M) Relative cell growth of KL (Red: A549 and H1944 cells), KLP (Purple: HCC44, H23, H2122, and H1355 cells), and KP (Blue: H2009, H1792, H441, and H358 cells) NSCLC lines treated with 2.5  $\mu$ M MMB and 1  $\mu$ M Lin for 72 hr normalized to 2.5  $\mu$ M MMB treated cells.

(N) Phase-contrast images of A549, H23, and H1792 cells treated with 2.5  $\mu$ M MMB with or without 1  $\mu$ M Lin for 96 hr. Scale bars: 100  $\mu$ m. Red cell lines: KL. Purple cell lines: KLP. Blue cell lines: KP.

(O) Relative cell growth of A549 treated with 2.5  $\mu$ M MMB, 1  $\mu$ M Selu and/or 1  $\mu$ M Lin in accordance to the indicated schedule (lower) for 1 week (n = 9).

(P) Percent change in mouse body weight of *LSL-Kras<sup>G12D</sup>;Lkb1<sup>ff</sup>* and *LSL-Kras<sup>G12D</sup>;Trp53<sup>ff</sup>* mice during MMB + Tram + Lin combination therapy (3 days on and 4 days off) (each group; n = 5).

(Q) Percent change in MRI tumor volume of *LSL-Kras<sup>G12D</sup>;Lkb1<sup>ff</sup>* or *LSL-Kras<sup>G12D</sup>;Trp53<sup>ff</sup>*-induced lung cancer 1 week following MMB + Tram or MMB + Tram + Lin therapy (treatment schedule 3 days on and 4 days off). MMB 10 mg/kg, Tram 2 mg/kg, Lin 7.5 mg/kg.

(R) Representative MRI images from *LSL-Kras<sup>G12D</sup>;Lkb1<sup>ff</sup>* mice treated with MMB + Tram therapy (upper) and *LSL-Kras<sup>G12D</sup>;Trp53<sup>ff</sup>* mice treated with MMB + Tram + Lin therapy (lower) for the indicated time. H indicates heart.

All quantitative data are represented as mean  $\pm$  S.D; \*p < 0.05, \*\*p < 0.01.

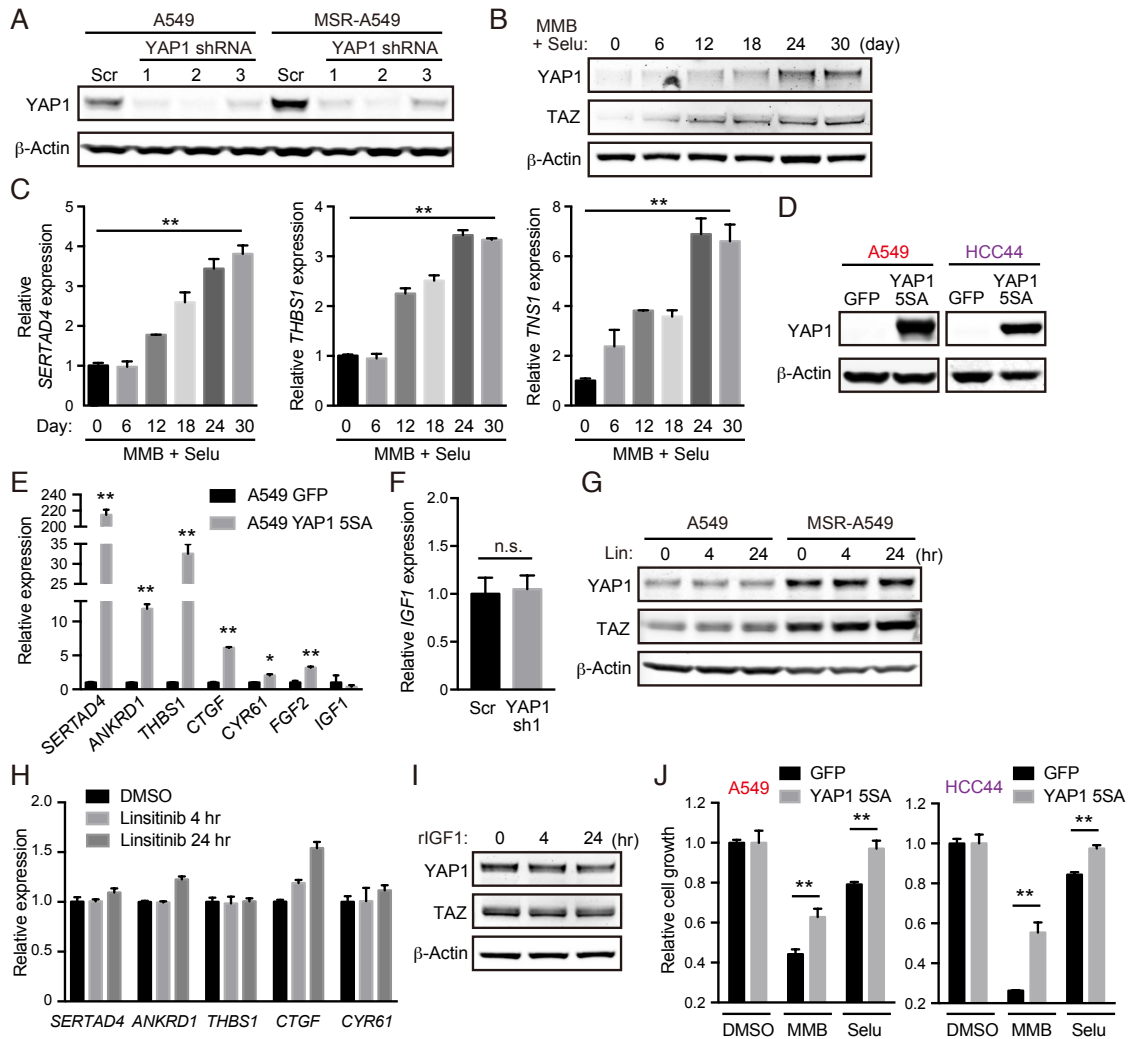

**Figure S3. YAP1 pathway activation in response to MMB and MEK inhibition (Related to Figure 3)**

(A) IB of the indicated proteins in A549 and MSR-A549 cells transfected with the indicated shRNA.

(B) IB of the indicated proteins in A549 treated with 5  $\mu$ M MMB and 1  $\mu$ M Selu for the indicated time.

(C) qRT-PCR of *SETAD4*, *THBS1*, and *TNS1* in A549 treated with 5  $\mu$ M MMB and 1  $\mu$ M Selu for the indicated time (n = 2).

(D) IB of the indicated proteins in A549 and HCC44 cells transfected with the indicated vector.

(E) qRT-PCR of *SERTAD4*, *ANKRD1*, *THBS1*, *CTGF*, *CYR61*, *FGF2*, and *IGF1* in A549 cells transfected with the indicated vector (n = 2).

(F) qRT-PCR of *IGF1* in MSR-A549 cells transfected with the indicated shRNA

(n = 4). n.s.: Not significant.

(G) IB of the indicated proteins in A549 and MSR-A549 cells treated with 1  $\mu$ M Lin for the indicated time.

(H) qRT-PCR of *SERTAD4*, *ANKRD1*, *THBS1*, *CTGF* and *CYR61* in MSR-A549 cells transduced with 1  $\mu$ M Lin for the indicated time (n = 2).

(I) IB of the indicated proteins in A549 treated with 100 ng/ml recombinant IGF1 for the indicated time.

(J) Relative cell growth of A549 and HCC44 transduced with the indicated vector in the presence of 2.5  $\mu$ M MMB or 1  $\mu$ M Selu for 72 hr.

All quantitative data are represented as mean  $\pm$  S.D; \*p < 0.05, \*\*p < 0.01.



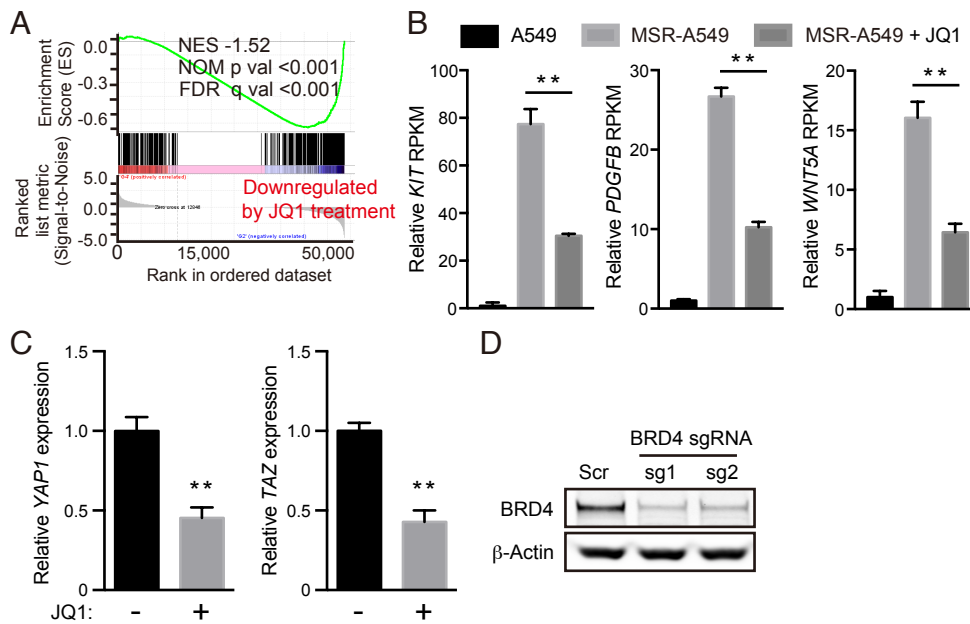

**Figure S4. BET inhibition suppresses transcriptional adaptation to MMB and MEK inhibition (Related to Figure 4)**

(A) GSEA analyses of MSR-signature (overlap of genes upregulated by RNA-seq and enriched by histone H3K27 acetylation ChIP-seq in MSR-A549 cells compared with A549 cells) in DMSO vs. JQ1 treated A549 (See STAR methods). NES: normalized enrichment score. NOM: nominal. FDR: false discovery rate.

(B) Relative RPKM (Reads per kilobase million) values of *KIT*, *PDGFB* and *WNT5A* in A549 and MSR-A549 cells treated with or without 200 nM JQ1 for 24 hr (n = 3).

(C) qRT-PCR of *YAP1* and *TAZ* in MSR-A549 cells treated with or without 500 nM JQ1 for 24 hr (n = 4).

(D) IB of the indicated proteins in A549 transduced with the indicated sgRNA.

All quantitative data are represented as mean  $\pm$  S.D; \*\*p < 0.01.

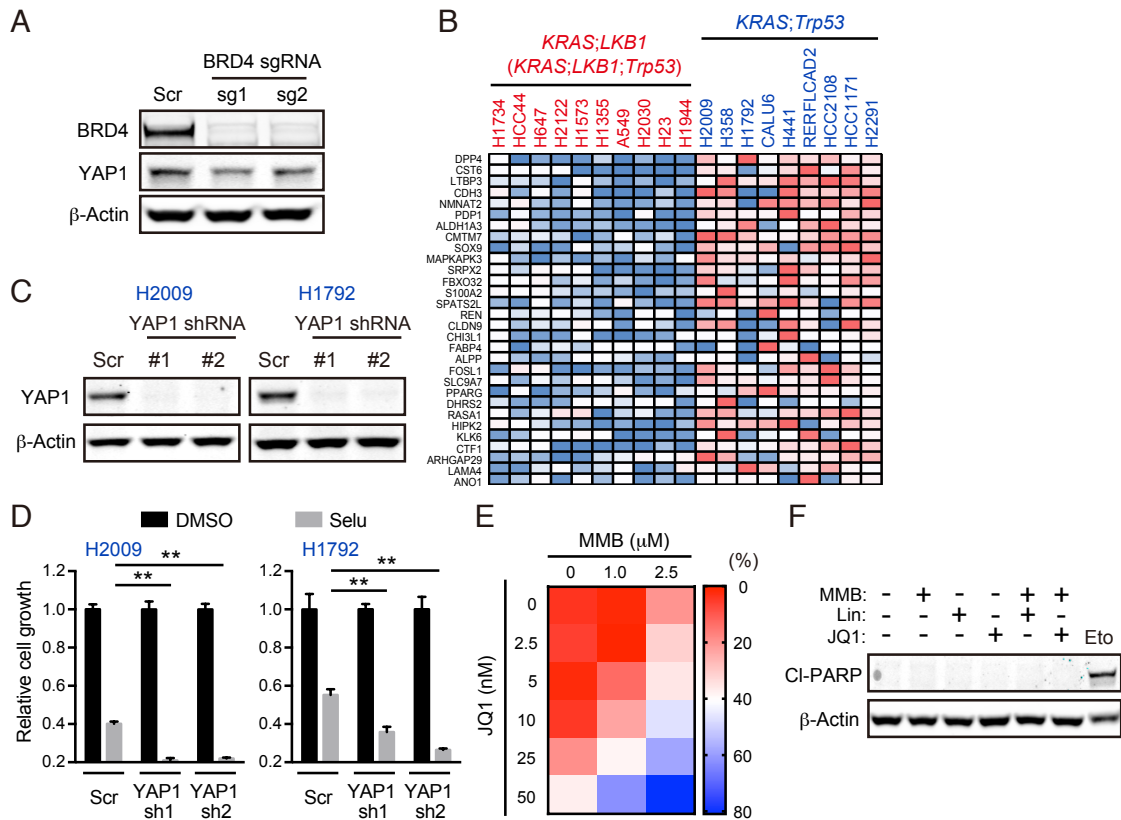

**Figure S5. YAP1 activation in KP cells contributes to baseline resistance (Related to Figure 5)**

(A) IB of the indicated proteins in H2009 transduced with the indicated sgRNA.

(B) Heat map of RPKM values of highly expressed genes in KP lung adenocarcinoma cell lines (blue) compared with in KL and KLP lung adenocarcinoma cell lines (red) provided by Cancer Cell Line Encyclopedia (CCLE) (See STAR methods).

(C) IB of the indicated proteins in H2009 and H1792 cells transduced with the indicated shRNA.

(D) Relative cell growth of H2009 and H1792 transduced with the indicated shRNA in the presence of 1  $\mu$ M Selu for 96 hr (n = 3).

(E) Percentage inhibition in H2009 cells at each concentration of MMB and JQ1 for 96 hr.

(F) IB of the indicated proteins in mouse embryonic fibroblast (MEF) treated with 2.5  $\mu$ M MMB, 1  $\mu$ M Lin and/or 500 nM JQ1 for 24 hr, and treated with 10  $\mu$ M etoposide (Eto) for 48 hr as a positive control for apoptosis induction.

All quantitative data are represented as mean  $\pm$  S.D; \*\*p < 0.01

Table S3, related to Figure 5

*KRAS*, *LKB1*, and *TP53* mutational status of TCGA samples studied.

| TCGA sample ID | <i>KRAS</i> | <i>STK11/LKB1</i> | <i>TP53</i> |
|----------------|-------------|-------------------|-------------|
| TCGA-55-7726   | Mut         |                   | Mut         |
| TCGA-95-7567   | Mut         |                   | Mut         |
| TCGA-55-7576   | Mut         |                   | Mut         |
| TCGA-50-5941   | Mut         |                   | Mut         |
| TCGA-44-6777   | Mut         |                   | Mut         |
| TCGA-99-7458   | Mut         |                   | Mut         |
| TCGA-97-7554   | Mut         |                   | Mut         |
| TCGA-55-7911   | Mut         |                   | Mut         |
| TCGA-78-7145   | Mut         |                   | Mut         |
| TCGA-05-4405   | Mut         |                   | Mut         |
| TCGA-55-7907   | Mut         |                   | Mut         |
| TCGA-05-4430   | Mut         |                   | Mut         |
| TCGA-95-7039   | Mut         |                   | Mut         |
| TCGA-50-5933   | Mut         |                   | Mut         |
| TCGA-69-7980   | Mut         |                   | Mut         |
| TCGA-49-4505   | Mut         |                   | Mut         |
| TCGA-64-1677   | Mut         |                   | Mut         |
| TCGA-64-5775   | Mut         |                   | Mut         |
| TCGA-97-7938   | Mut         |                   | Mut         |
| TCGA-55-7283   | Mut         |                   | Mut         |
| TCGA-64-5778   | Mut         |                   | Mut         |
| TCGA-78-7148   | Mut         | Mut               |             |
| TCGA-73-7498   | Mut         | Mut               |             |
| TCGA-44-6776   | Mut         | Mut               |             |
| TCGA-78-7161   | Mut         | Mut               |             |
| TCGA-05-4417   | Mut         | Mut               |             |
| TCGA-53-7813   | Mut         | Mut               |             |
| TCGA-91-6849   | Mut         | Mut               |             |
| TCGA-86-7713   | Mut         | Mut               |             |
| TCGA-80-5608   | Mut         | Mut               |             |
| TCGA-50-5932   | Mut         | Mut               |             |
| TCGA-35-3615   | Mut         | Mut               |             |
| TCGA-64-5774   | Mut         | Mut               |             |
| TCGA-78-7167   | Mut         | Mut               |             |
| TCGA-50-7109   | Mut         | Mut               |             |
| TCGA-44-7671   | Mut         | Mut               |             |
| TCGA-55-6983   | Mut         | Mut               |             |
| TCGA-55-6970   | Mut         | Mut               |             |

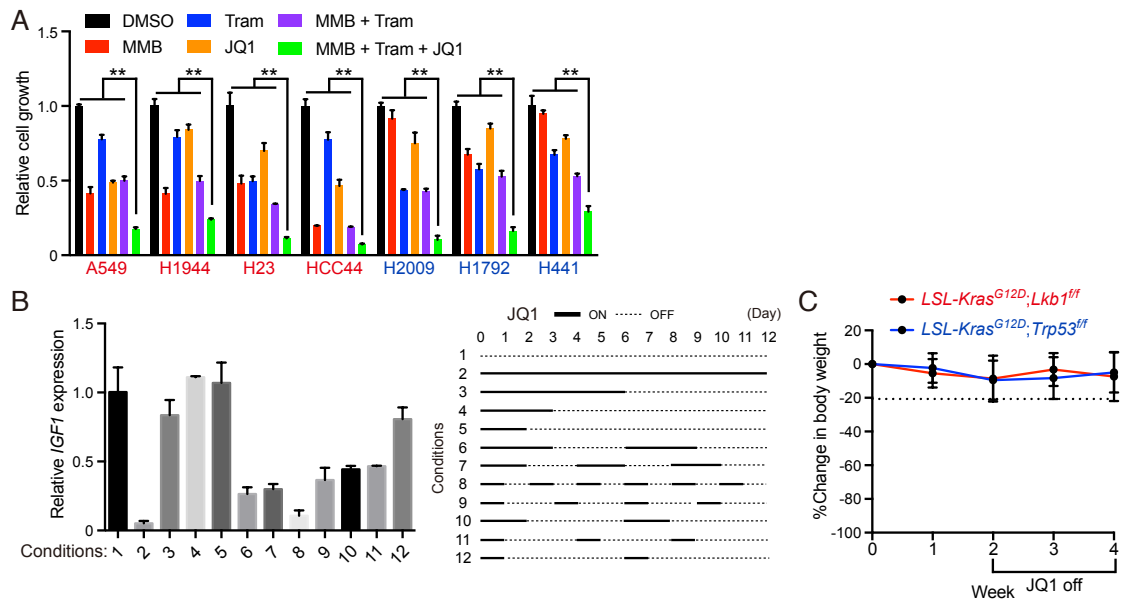

**Figure S6. Development of triple combination MMB, Tram, and JQ1 therapy schedule (Related to Figure 6)**

(A) Relative cell growth of A549, H1944, HCC44, H23, H2009, H1792, and H441 cells in the presence of 2.5  $\mu$ M MMB, 10 nM Tram and/or 200 nM JQ1 for 72 hr (n = 3). Red cell lines: KL and KLP. Blue cell lines: KP.

(B) qRT-PCR of *IGF1* in A549 continuously treated with 5  $\mu$ M MMB and 1  $\mu$ M Selu and intermittently treated with 200 nM JQ1 in accordance to the indicated schedule (right) for 12 days (n = 2).

(C) Percent change in mouse body weight of *LSL-Kras<sup>G12D</sup>;Lkb1<sup>fl/fl</sup>* and *LSL-Kras<sup>G12D</sup>;Trp53<sup>fl/fl</sup>* mice during MMB + Tram + JQ1 combination therapy (each group; n = 7). All quantitative data are represented as mean  $\pm$  S.D; \*\*p < 0.01.

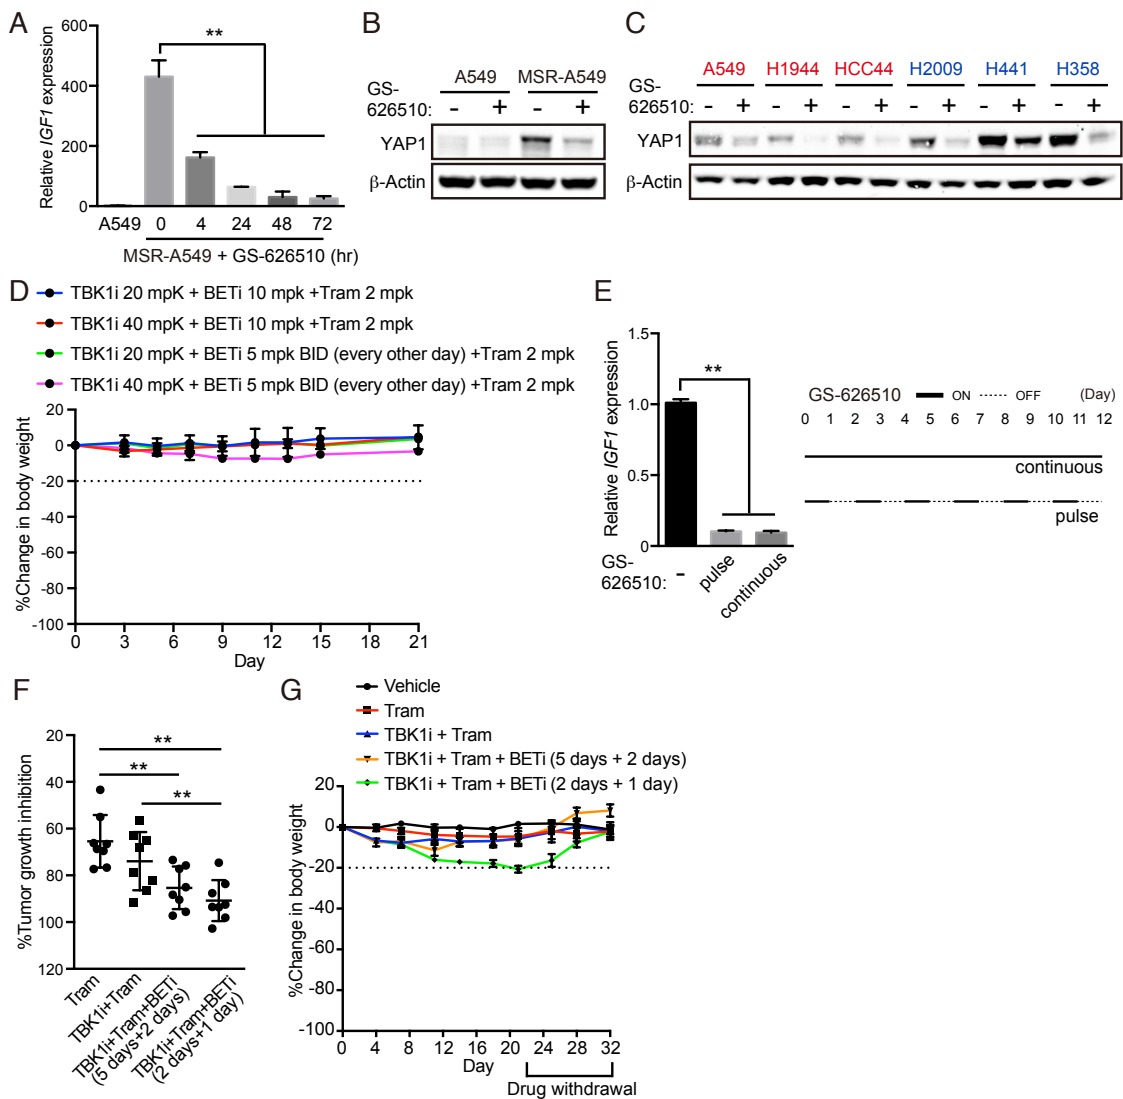

**Figure S7. Development of triple combination TBK1i, Tram, and BETi therapy schedule (Related to Figure 7)**

(A) qRT-PCR of *IGF1* in A549 and MSR-A549 cells treated with 200 nM GS-626510 for the indicated times (n = 2).

(B) IB of the indicated proteins in A549 and MSR-A549 cells treated with or without 200 nM GS-626510 (BETi) for 24 hr.

(C) IB of the indicated proteins in A549, H1944, HCC44, H2009, H441, and H358 cells treated with or without 500 nM GS-626510 for 24 hr. Red cell lines: KL. Blue cell lines: KP.

(D) Percent change in mouse body weight of mice during combination therapy in accordance to the indicated schedule (each group; n = 10). TBK1i = Compound

1. mpk: mg per kg.

(E) qRT-PCR of *IGF1* in MSR-A549 continuously treated with 200 nM GS-626510 or intermittently treated with 200 nM GS-626510 in accordance to the indicated schedule (right) for 12 days (n = 2).

(F) Percent tumor growth inhibition of DFCI366 PDX following pulse treatment of 40 mg/kg Compound 1, 2 mg/kg Tram, and/or 40 mg/kg GS-626510 in accordance to the indicated schedule (See figure 7F) for 22 days.

(G) Percent change in mouse body weight of mice during pulse treatment in accordance to the indicated schedule (See figure 7F) for 22 days, and 10 days after drug withdrawal (each group; n = 8).

All quantitative data are represented as mean  $\pm$  S.D; \*\*p < 0.01.

Table S4, related to STAR Methods

Primers for qRT-PCR, ChIP-qPCR, construction of sh/sgRNA-expressing vectors and mycoplasma monitoring.

**For qRT-PCR**

|               | <b>Forward (5'-3')</b>  | <b>Reverse (5'-3')</b>   |
|---------------|-------------------------|--------------------------|
| human IL6     | ATTCAATGAGGAGACTTGCTGGT | ACTCATCTGCACAGCTCTGGCTTG |
| human CCL2    | CCCCAGTCACCTGCTGTTAT    | TGGAATCCTGAACCCACTTC     |
| human CCL5    | CCAGCAGTCGTCTTTGTACAC   | CTCTGGGTTGGCACACACTT     |
| human SERTAD4 | TGGCAGGATCACATTACAGG    | TAAAGGATGTGGGCTCGTTC     |
| human THBS1   | TTGTCTTTGGAACCACACCA    | CTGGACAGCTCATCACAGGA     |
| human TNS1    | TGAGATACCCTGAGGAACG     | CACAGTCGGGAGAGGAGAAG     |
| human GLIS2   | AACGCCAGGTACAAGATGCT    | GCTTAAAGCGGTCACTGGAG     |
| human CDKN2C  | TGCACAAAATGGATTTGGAA    | GGGCAGGTTCCCTTCATTAT     |
| human SGK1    | AGGGCAGTTTTGGAAAGGTT    | CAGGAAAGGGTGCTTCACAT     |
| human MYO1C   | ATCCCATTATGAGCCAGTGC    | CATCATTGGGTTTGATGCAG     |
| human FGF2    | GGGGGTGGAGATGTAGAAGA    | GGTTCACGGATGGGTGTCT      |
| human PHGDH   | GTCATCAACGCAGCTGAGAA    | AGGCACATGATCATTCCACA     |
| human CTGF    | AGGAGTGGGTGTGTGACGA     | CCAGGCAGTTGGCTCTAATC     |
| human ANKRD1  | AGTAGAGGAAGTGGTCACTGG   | TGGGCTAGAAGTGTCTTCAGAT   |
| human CYR61   | CCTCGGCTGGTCAAAGTTAC    | GAGGCTCCATTCCAAAAACA     |
| human TAZ     | CATCTCAACCCCATCATCCT    | GAGCTGCTCTGCCTGAGTCT     |
| human 36B4    | CAGATTGGCTACCCAACTGTT   | GGAAGGTGTAATCCGTCTCCA    |

**For sh/sgRNA vector**

|                    | <b>Target sequence (5'-3')</b> |
|--------------------|--------------------------------|
| LKB1 sgRNA1        | GTA CTCCATCACCATATACG          |
| LKB1 sgRNA2        | CTTCAAGGTGGACATCTGGT           |
| BRD4 sgRNA1        | GAGCAGGATTGCAGTTGGT            |
| BRD4 sgRNA2        | AGTCGAACTGTCACTGTCCG           |
| pLKO.1 YAP1 shRNA1 | CAGGTGATACTATCAACCAAA          |
| pLKO.1 YAP1 shRNA2 | CGACCAATAGCTCAGATCCTT          |

**For ChIP-qPCR**

|                     | <b>Forward (5'-3')</b> | <b>Reverse (5'-3')</b> |
|---------------------|------------------------|------------------------|
| human IGF1 promoter | CCTCATCGCAGGAGAAAAAG   | CCCTGAAGTGACTGGGGTAA   |

**For Mycoplasma detection**

|  | <b>Forward (5'-3')</b> | <b>Reverse (5'-3')</b>     |
|--|------------------------|----------------------------|
|  | ACACCATGGGAGCTGGTAAT   | CTTCWATCGACTTYCAGACCCAAGGC |
